# Supplementary material for: Reverse synthesis of yolk–shell metal–organic frameworks
Source: Royal Society of Chemistry journal article supplement (doi:10.1039/d1cc00548k), 2021-01-01
Supplement: d1cc00548k1.pdf [file d1cc00548k1.pdf]

## Supporting Information

### Reverse Synthesis of Yolk-Shell Metal-Organic Frameworks

Songwei Zhang,<sup>abc</sup> Yaqi Fan,<sup>a</sup> Lianshun Luo,<sup>a</sup> Conger Li,<sup>a</sup> Yanhang Ma,<sup>a</sup> and Tao Li<sup>\*a</sup>

*<sup>a</sup>School of Physical Science and Technology, ShanghaiTech University, 201210 Shanghai, People's Republic of China*

*<sup>b</sup>Shanghai Advanced Research Institute, Chinese Academy of Sciences 201203, Shanghai, People's Republic of China*

*<sup>c</sup>University of Chinese Academy of Sciences, Beijing 100049, People's Republic of China*

## Experimental Section

### Materials

Zinc acetate dihydrate ( $\text{Zn(OAc)}_2 \cdot 2\text{H}_2\text{O}$ , AR, Aladdin), Zinc nitrate hexahydrate ( $\text{Zn(NO}_3)_2 \cdot 6\text{H}_2\text{O}$ , AR, Aladdin), Cobaltous Nitrate Hexahydrate ( $\text{Co(NO}_3)_2 \cdot 6\text{H}_2\text{O}$ , AR, Aladdin), Cobalt(II) acetate tetrahydrate ( $\text{Co(OAc)}_2 \cdot 4\text{H}_2\text{O}$ , AR, Aladdin), 2-Methylimidazole (HMIM, AR, Adamas), Methanol (AR,  $\geq 99.5\%$ , GENERAL-REAGENT), Acetic acid (HOAc, ACS,  $\geq 99.7\%$ , Aladdin), Zirconium(IV) chloride (98%, anhydrous, Alfa Aesar), Zirconyl chloride octahydrate (AR, GENERAL-REAGENT), Terephthalic acid (BDC, RG, 99%, Adamas), 2,5-Dihydroxyterephthalic acid (DOBDC, RG, 99%+, Adamas), N,N-Dimethylformamide (DMF,  $>99.5\%$ , GENERAL-REAGENT), Nitric acid ( $\text{HNO}_3$ , AR, GENERAL-REAGENT), Deionized water (DI-water), Ethanol (AR, GENERAL-REAGENT), Dichloromethane (DCM, GENERAL-REAGENT), Petroleum ether (PE, GENERAL-REAGENT), polyvinylpyrrolidone (PVP,  $M_w \sim 24000$ , aladdin).

### Synthesis of MOF

**Synthesis of UiO-66-(OH)<sub>2</sub>:** 1.1424 g PVP was pre-dissolved in 10 mL DMF. 42 mg  $\text{ZrCl}_4$  and 35.7 mg DOBDC were added to 2.7 mL DMF. Then 349  $\mu\text{L}$  PVP/DMF solution was added and mixed adequately. 2.56 mL acetic acid and 0.1 mL DI water were added subsequently. The well-mixed solution was left undisturbed for 2 hours in the oven of 120 °C. As-synthesized UiO-66-(OH)<sub>2</sub> was centrifuged and washed with DMF twice. The collected UiO-66-(OH)<sub>2</sub> was dispersed in 4 mL DMF for future use.

**Synthesis of UiO-66-(OH)<sub>2</sub>@UiO-66:** 0.15 mmol BDC was added into a mixed solution of 2 mL DMF and 2 mL acetic acid, and then allowed to react at 90 °C for 5 minutes with stirring. 1 mL as-synthesized UiO-66-(OH)<sub>2</sub> suspension in DMF was added and stirred for another 5 minutes. Finally, 1 mL DMF containing 10.5 mg ZrOCl<sub>2</sub>·8H<sub>2</sub>O was added and stirred at 90 °C for 4 hours. The obtained UiO-66-(OH)<sub>2</sub>@UiO-66 samples were centrifuged and washed with DMF twice. The collected products were dispersed in 4 mL methanol for future use.

**Synthesis of hollow UiO-66 (H-UiO-66) by HNO<sub>3</sub>:** 1 mL as-synthesized UiO-66-(OH)<sub>2</sub>@UiO-66 was centrifuged, dried and dispersed in 5 mL 10 M HNO<sub>3</sub>. The suspension was stirred for 2 days. The resulting hollow UiO-66 samples were centrifuged and washed with DMF twice. To remedy defects in hollow MOFs generated during etching, the hollow MOFs were incubated in a DMF solution contain excess ligands. Briefly, about 20 mg hollow sample was dispersed in a 25 mL DMF solution containing 50 mM BDC. After stirring at 100 °C for 3 days, the sample was collected and washed with DMF twice.

**Synthesis of ZIF-8@H-UiO-66:** The ZIF-8 precursor stock solution was first prepared (mol ratio of Zn(OAc)<sub>2</sub>: HOAc: HMIM:DI-water= 1:3:4.4:100). 8 mg dried H-UiO-66 samples were dispersed with 90 µl precursor solution of ZIF-8 and 1.2 ml ethanol. Dichloromethane (DCM, 2.4 mL) was added to the mixture and sonicated for 5 min to give a clear solution. After adding 6.0 ml petroleum ether (PE), white precipitate was formed. After drying the precipitate in a 120 °C oven, precursors@H-UiO-66 was

obtained. Then the sample was soaked in the methanol solution of HMIM (100 mg/ml) overnight to obtain ZIF-8@H UiO-66.

**Synthesis of ZIF-67@H UiO-66:** Similarly,  $\text{Zn}(\text{OAc})_2$  was replaced by  $\text{Co}(\text{OAc})_2$  with the same molar quantity in the preparation of ZIF-67 precursor solution. Precursors@H UiO-66 was synthesized using the same method above. The samples were then soaked in a water solution of HMIM (100 mg/ml) overnight to obtain ZIF-67@H UiO-66.

**Synthesis of ZIF-8<sup>1</sup>:** 1.05 g  $\text{Zn}(\text{NO}_3)_2 \cdot 6\text{H}_2\text{O}$  and 2.34 g HMIM were added into 50 ml methanol at room temperature (RT). After 6 hours, a large amount of white precipitate was produced. The obtained ZIF-8 was centrifuged and washed with methanol twice. The collected products were redispersed in 30 mL methanol for future use.

**Synthesis of ZIF-67<sup>2</sup>:** 0.45 g  $\text{Co}(\text{NO}_3)_2 \cdot 6\text{H}_2\text{O}$  and 5.5 g HMIM were added into 23 ml DI-water at room temperature (RT). After 6 hours, a large amount of purple precipitate was produced. The obtained ZIF-67 was centrifuged and washed with methanol twice. The collected products were redispersed in 30 mL methanol for future use.

## **Instrumentation**

**Powder X-ray diffraction (PXRD) patterns** were collected on an X-ray diffractometer (Bruker D8 PHASER) with  $\text{Cu K}\alpha$  radiation, operated at 40 kV and 40 mA.

**High-resolution scanning electron microscope (HRSEM) images** were obtained using a JSM-7800F Prime Scanning Electron Microscopy at 5 kV. The samples were pre-coated with Au for 10 seconds using an SBC-12 sputter coater.

**Transmission electron microscope (TEM) images** were taken on a JEM 2100 plus (200 kV) or JEM 1400 plus (120 kV). Powder samples were first evenly dispersed in methanol. Then, a 2.0  $\mu\text{l}$  solution droplet was added onto a carbon-coated copper grid.

**Gas sorption.  $\text{N}_2$  adsorption isotherms** were collected by a volumetric gas adsorption analyzer (Quantachrome Instruments Autosorb-iQ-MP-AG). Typically, a 50-80 mg powder sample was loaded in a 6 mm large bulb sample cell and degassed under vacuum at 120  $^\circ\text{C}$  for 8 h.

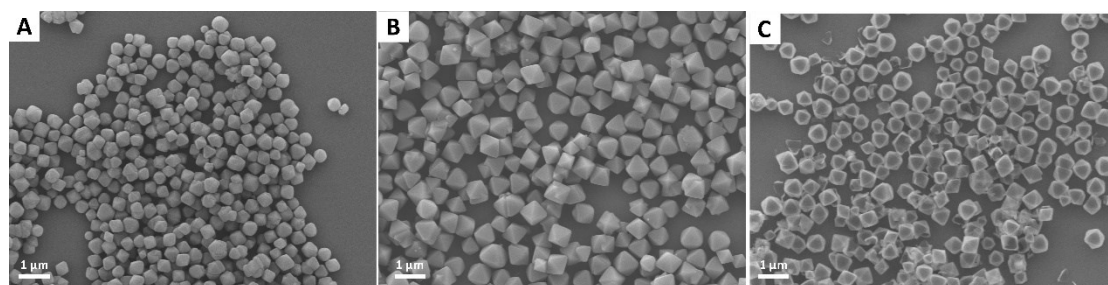

**Fig. S1.** The SEM images of (A)  $\text{UiO-66-(OH)}_2$ , (B)  $\text{UiO-66-(OH)}_2@ \text{UiO-66}$ , (C) H- $\text{UiO-66}$ .

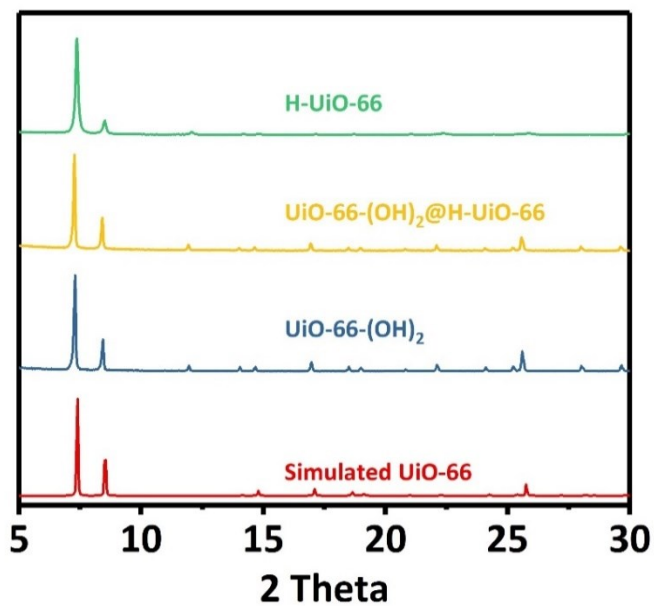

**Fig. S2.** The PXRD pattern of UiO-66-(OH)<sub>2</sub>, UiO-66-(OH)<sub>2</sub>@UiO-66, and H-UiO-66.

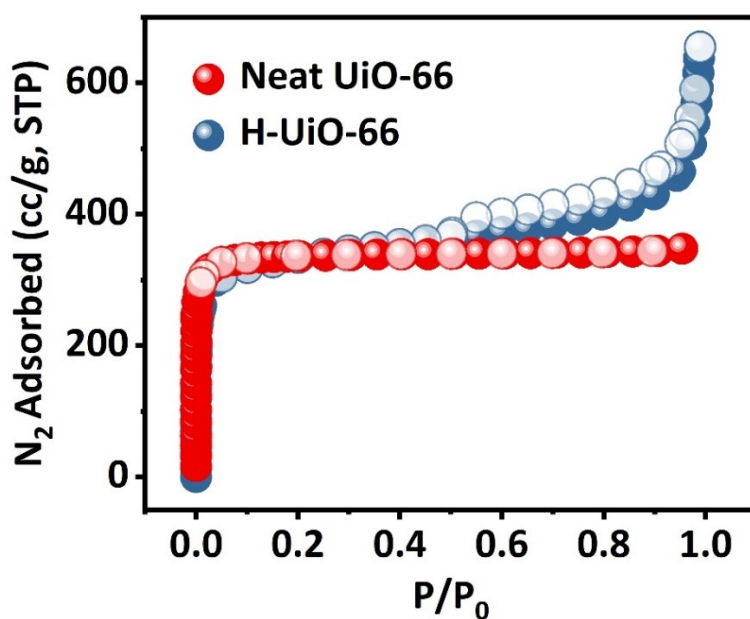

**Fig. S3.** N<sub>2</sub> sorption isotherms of neat UiO-66 and H-UiO-66 at 77K.

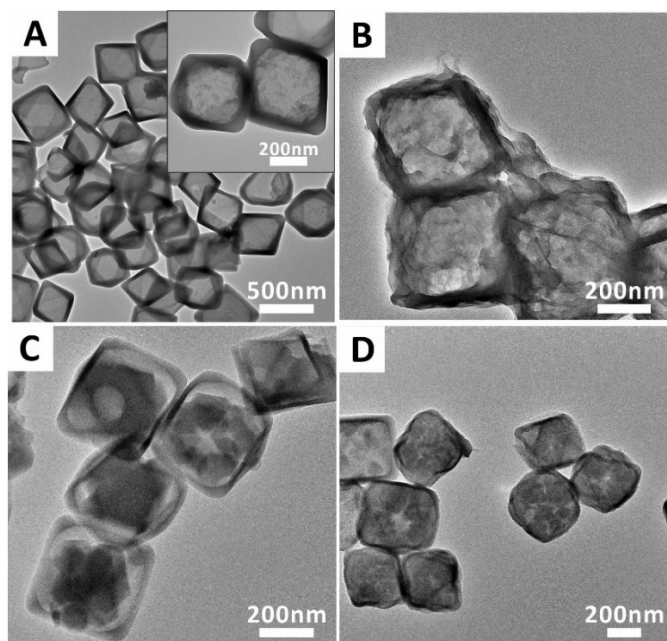

**Fig. S4.** The TEM image of (A) ZIF-8 precursors@H-UiO-66, (B) ZIF-67 precursors@H-UiO-66, (C) ZIF-8@H-UiO-66, (D) ZIF-67@H-UiO-66.

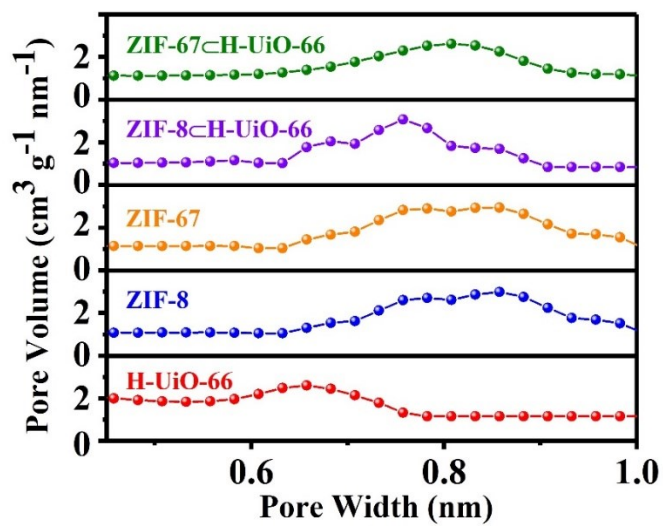

**Fig. S5.** Pore size distribution of neat MOFs and ZIF-8/67@H-UiO-66 calculated from  $N_2$  adsorption isotherms at 77 K.

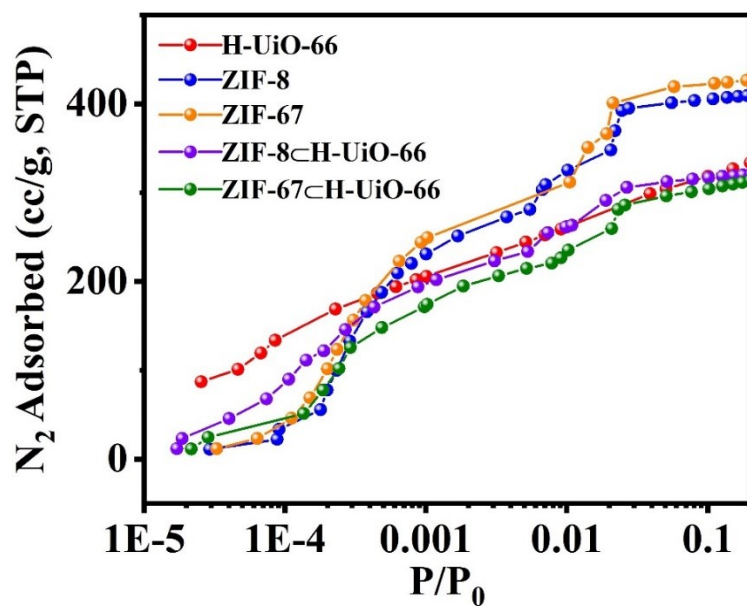

**Fig. S6.** N<sub>2</sub> sorption isotherms of neat MOFs and ZIF-8/67@H-UiO-66 at 77K.

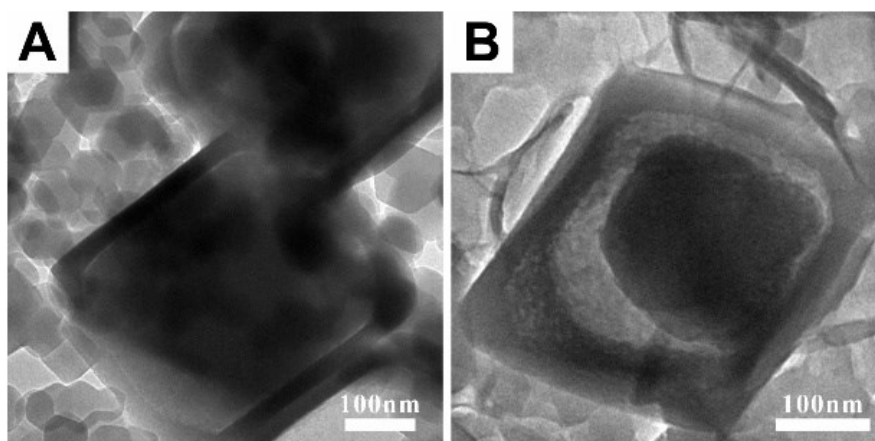

**Fig. S7.** TEM images of (A) mixture of ZIF-8@H-UiO-66 and ZIF-8, (B) mixture of ZIF-8@H-UiO-66 and ZIF-8 after soaking in 0.5 M gallic acid / ethanol solution at 60 °C for 1 h.

## Reference

1. J. Cravillon, S.-J. Lohmeier, A. Feldhoff, K. Huber, and M. Wiebcke, *Chem. Mater.*, 2009, **21**, 1410-1412.
2. J. Qian, F. Sun and L. Qin, *Mater. Lett.*, 2012, **82**, 220-223.
